# Supplementary material
Source: MDPI journal article supplement (https://www.mdpi.com/2313-433X/9/12/283)
Supplement: s1 [file s1]

# UNet

| Layer # | Name            | Type         | Shape                 |
|---------|-----------------|--------------|-----------------------|
| 0       | input_1         | InputLayer   | [(None, 1, 512, 512)] |
| 1       | conv2d          | Conv2D       | (None, 32, 512, 512)  |
| 2       | dropout         | Dropout      | (None, 32, 512, 512)  |
| 3       | conv2d_1        | Conv2D       | (None, 32, 512, 512)  |
| 4       | max_pooling2d   | MaxPooling2D | (None, 32, 256, 256)  |
| 5       | conv2d_2        | Conv2D       | (None, 64, 256, 256)  |
| 6       | dropout_1       | Dropout      | (None, 64, 256, 256)  |
| 7       | conv2d_3        | Conv2D       | (None, 64, 256, 256)  |
| 8       | max_pooling2d_1 | MaxPooling2D | (None, 64, 128, 128)  |
| 9       | conv2d_4        | Conv2D       | (None, 128, 128, 128) |
| 10      | dropout_2       | Dropout      | (None, 128, 128, 128) |
| 11      | conv2d_5        | Conv2D       | (None, 128, 128, 128) |
| 12      | max_pooling2d_2 | MaxPooling2D | (None, 128, 64, 64)   |
| 13      | conv2d_6        | Conv2D       | (None, 256, 64, 64)   |
| 14      | dropout_3       | Dropout      | (None, 256, 64, 64)   |
| 15      | conv2d_7        | Conv2D       | (None, 256, 64, 64)   |
| 16      | up_sampling2d   | UpSampling2D | (None, 256, 128, 128) |
| 17      | concatenate     | Concatenate  | (None, 384, 128, 128) |
| 18      | conv2d_8        | Conv2D       | (None, 128, 128, 128) |
| 19      | dropout_4       | Dropout      | (None, 128, 128, 128) |
| 20      | conv2d_9        | Conv2D       | (None, 128, 128, 128) |
| 21      | up_sampling2d_1 | UpSampling2D | (None, 128, 256, 256) |
| 22      | concatenate_1   | Concatenate  | (None, 192, 256, 256) |
| 23      | conv2d_10       | Conv2D       | (None, 64, 256, 256)  |
| 24      | dropout_5       | Dropout      | (None, 64, 256, 256)  |
| 25      | conv2d_11       | Conv2D       | (None, 64, 256, 256)  |
| 26      | up_sampling2d_2 | UpSampling2D | (None, 64, 512, 512)  |
| 27      | concatenate_2   | Concatenate  | (None, 96, 512, 512)  |
| 28      | conv2d_12       | Conv2D       | (None, 32, 512, 512)  |
| 29      | dropout_6       | Dropout      | (None, 32, 512, 512)  |
| 30      | conv2d_13       | Conv2D       | (None, 32, 512, 512)  |
| 31      | conv2d_14       | Conv2D       | (None, 1, 512, 512)   |
| 32      | activation      | Activation   | (None, 1, 512, 512)   |

**Table S1:** Transformation functions layer by layer of the UNet architecture

## R2-UNet

| Layer # | Name            | Type         | Shape                 |
|---------|-----------------|--------------|-----------------------|
| 0       | input_2         | InputLayer   | [(None, 1, 512, 512)] |
| 1       | conv2d_15       | Conv2D       | (None, 32, 512, 512)  |
| 2       | conv2d_16       | Conv2D       | (None, 32, 512, 512)  |
| 3       | activation_1    | Activation   | (None, 32, 512, 512)  |
| 4       | add             | Add          | (None, 32, 512, 512)  |
| 5       | conv2d_17       | Conv2D       | (None, 32, 512, 512)  |
| 6       | activation_2    | Activation   | (None, 32, 512, 512)  |
| 7       | add_1           | Add          | (None, 32, 512, 512)  |
| 8       | conv2d_18       | Conv2D       | (None, 32, 512, 512)  |
| 9       | activation_3    | Activation   | (None, 32, 512, 512)  |
| 10      | conv2d_19       | Conv2D       | (None, 32, 512, 512)  |
| 11      | activation_4    | Activation   | (None, 32, 512, 512)  |
| 12      | add_2           | Add          | (None, 32, 512, 512)  |
| 13      | conv2d_20       | Conv2D       | (None, 32, 512, 512)  |
| 14      | activation_5    | Activation   | (None, 32, 512, 512)  |
| 15      | add_3           | Add          | (None, 32, 512, 512)  |
| 16      | conv2d_21       | Conv2D       | (None, 32, 512, 512)  |
| 17      | activation_6    | Activation   | (None, 32, 512, 512)  |
| 18      | add_4           | Add          | (None, 32, 512, 512)  |
| 19      | max_pooling2d_3 | MaxPooling2D | (None, 32, 256, 256)  |
| 20      | conv2d_22       | Conv2D       | (None, 64, 256, 256)  |
| 21      | conv2d_23       | Conv2D       | (None, 64, 256, 256)  |
| 22      | activation_7    | Activation   | (None, 64, 256, 256)  |
| 23      | add_5           | Add          | (None, 64, 256, 256)  |
| 24      | conv2d_24       | Conv2D       | (None, 64, 256, 256)  |
| 25      | activation_8    | Activation   | (None, 64, 256, 256)  |
| 26      | add_6           | Add          | (None, 64, 256, 256)  |
| 27      | conv2d_25       | Conv2D       | (None, 64, 256, 256)  |
| 28      | activation_9    | Activation   | (None, 64, 256, 256)  |
| 29      | conv2d_26       | Conv2D       | (None, 64, 256, 256)  |
| 30      | activation_10   | Activation   | (None, 64, 256, 256)  |
| 31      | add_7           | Add          | (None, 64, 256, 256)  |
| 32      | conv2d_27       | Conv2D       | (None, 64, 256, 256)  |
| 33      | activation_11   | Activation   | (None, 64, 256, 256)  |
| 34      | add_8           | Add          | (None, 64, 256, 256)  |
| 35      | conv2d_28       | Conv2D       | (None, 64, 256, 256)  |
| 36      | activation_12   | Activation   | (None, 64, 256, 256)  |
| 37      | add_9           | Add          | (None, 64, 256, 256)  |
| 38      | max_pooling2d_4 | MaxPooling2D | (None, 64, 128, 128)  |
| 39      | conv2d_29       | Conv2D       | (None, 128, 128, 128) |
| 40      | conv2d_30       | Conv2D       | (None, 128, 128, 128) |
| 41      | activation_13   | Activation   | (None, 128, 128, 128) |
| 42      | add_10          | Add          | (None, 128, 128, 128) |
| 43      | conv2d_31       | Conv2D       | (None, 128, 128, 128) |
| 44      | activation_14   | Activation   | (None, 128, 128, 128) |
| 45      | add_11          | Add          | (None, 128, 128, 128) |
| 46      | conv2d_32       | Conv2D       | (None, 128, 128, 128) |
| 47      | activation_15   | Activation   | (None, 128, 128, 128) |

|    |                 |              |                       |
|----|-----------------|--------------|-----------------------|
| 48 | conv2d_33       | Conv2D       | (None, 128, 128, 128) |
| 49 | activation_16   | Activation   | (None, 128, 128, 128) |
| 50 | add_12          | Add          | (None, 128, 128, 128) |
| 51 | conv2d_34       | Conv2D       | (None, 128, 128, 128) |
| 52 | activation_17   | Activation   | (None, 128, 128, 128) |
| 53 | add_13          | Add          | (None, 128, 128, 128) |
| 54 | conv2d_35       | Conv2D       | (None, 128, 128, 128) |
| 55 | activation_18   | Activation   | (None, 128, 128, 128) |
| 56 | add_14          | Add          | (None, 128, 128, 128) |
| 57 | max_pooling2d_5 | MaxPooling2D | (None, 128, 64, 64)   |
| 58 | conv2d_36       | Conv2D       | (None, 256, 64, 64)   |
| 59 | conv2d_37       | Conv2D       | (None, 256, 64, 64)   |
| 60 | activation_19   | Activation   | (None, 256, 64, 64)   |
| 61 | add_15          | Add          | (None, 256, 64, 64)   |
| 62 | conv2d_38       | Conv2D       | (None, 256, 64, 64)   |
| 63 | activation_20   | Activation   | (None, 256, 64, 64)   |
| 64 | add_16          | Add          | (None, 256, 64, 64)   |
| 65 | conv2d_39       | Conv2D       | (None, 256, 64, 64)   |
| 66 | activation_21   | Activation   | (None, 256, 64, 64)   |
| 67 | conv2d_40       | Conv2D       | (None, 256, 64, 64)   |
| 68 | activation_22   | Activation   | (None, 256, 64, 64)   |
| 69 | add_17          | Add          | (None, 256, 64, 64)   |
| 70 | conv2d_41       | Conv2D       | (None, 256, 64, 64)   |
| 71 | activation_23   | Activation   | (None, 256, 64, 64)   |
| 72 | add_18          | Add          | (None, 256, 64, 64)   |
| 73 | conv2d_42       | Conv2D       | (None, 256, 64, 64)   |
| 74 | activation_24   | Activation   | (None, 256, 64, 64)   |
| 75 | add_19          | Add          | (None, 256, 64, 64)   |
| 76 | up_sampling2d_3 | UpSampling2D | (None, 256, 128, 128) |
| 77 | lambda          | Lambda       | (None, 384, 128, 128) |
| 78 | conv2d_43       | Conv2D       | (None, 128, 128, 128) |
| 79 | conv2d_44       | Conv2D       | (None, 128, 128, 128) |
| 80 | activation_25   | Activation   | (None, 128, 128, 128) |
| 81 | add_20          | Add          | (None, 128, 128, 128) |
| 82 | conv2d_45       | Conv2D       | (None, 128, 128, 128) |
| 83 | activation_26   | Activation   | (None, 128, 128, 128) |
| 84 | add_21          | Add          | (None, 128, 128, 128) |
| 85 | conv2d_46       | Conv2D       | (None, 128, 128, 128) |
| 86 | activation_27   | Activation   | (None, 128, 128, 128) |
| 87 | conv2d_47       | Conv2D       | (None, 128, 128, 128) |
| 88 | activation_28   | Activation   | (None, 128, 128, 128) |
| 89 | add_22          | Add          | (None, 128, 128, 128) |
| 90 | conv2d_48       | Conv2D       | (None, 128, 128, 128) |
| 91 | activation_29   | Activation   | (None, 128, 128, 128) |
| 92 | add_23          | Add          | (None, 128, 128, 128) |
| 93 | conv2d_49       | Conv2D       | (None, 128, 128, 128) |
| 94 | activation_30   | Activation   | (None, 128, 128, 128) |
| 95 | add_24          | Add          | (None, 128, 128, 128) |
| 96 | up_sampling2d_4 | UpSampling2D | (None, 128, 256, 256) |
| 97 | lambda_1        | Lambda       | (None, 192, 256, 256) |

|     |                 |              |                      |
|-----|-----------------|--------------|----------------------|
| 98  | conv2d_50       | Conv2D       | (None, 64, 256, 256) |
| 99  | conv2d_51       | Conv2D       | (None, 64, 256, 256) |
| 100 | activation_31   | Activation   | (None, 64, 256, 256) |
| 101 | add_25          | Add          | (None, 64, 256, 256) |
| 102 | conv2d_52       | Conv2D       | (None, 64, 256, 256) |
| 103 | activation_32   | Activation   | (None, 64, 256, 256) |
| 104 | add_26          | Add          | (None, 64, 256, 256) |
| 105 | conv2d_53       | Conv2D       | (None, 64, 256, 256) |
| 106 | activation_33   | Activation   | (None, 64, 256, 256) |
| 107 | conv2d_54       | Conv2D       | (None, 64, 256, 256) |
| 108 | activation_34   | Activation   | (None, 64, 256, 256) |
| 109 | add_27          | Add          | (None, 64, 256, 256) |
| 110 | conv2d_55       | Conv2D       | (None, 64, 256, 256) |
| 111 | activation_35   | Activation   | (None, 64, 256, 256) |
| 112 | add_28          | Add          | (None, 64, 256, 256) |
| 113 | conv2d_56       | Conv2D       | (None, 64, 256, 256) |
| 114 | activation_36   | Activation   | (None, 64, 256, 256) |
| 115 | add_29          | Add          | (None, 64, 256, 256) |
| 116 | up_sampling2d_5 | UpSampling2D | (None, 64, 512, 512) |
| 117 | lambda_2        | Lambda       | (None, 96, 512, 512) |
| 118 | conv2d_57       | Conv2D       | (None, 32, 512, 512) |
| 119 | conv2d_58       | Conv2D       | (None, 32, 512, 512) |
| 120 | activation_37   | Activation   | (None, 32, 512, 512) |
| 121 | add_30          | Add          | (None, 32, 512, 512) |
| 122 | conv2d_59       | Conv2D       | (None, 32, 512, 512) |
| 123 | activation_38   | Activation   | (None, 32, 512, 512) |
| 124 | add_31          | Add          | (None, 32, 512, 512) |
| 125 | conv2d_60       | Conv2D       | (None, 32, 512, 512) |
| 126 | activation_39   | Activation   | (None, 32, 512, 512) |
| 127 | conv2d_61       | Conv2D       | (None, 32, 512, 512) |
| 128 | activation_40   | Activation   | (None, 32, 512, 512) |
| 129 | add_32          | Add          | (None, 32, 512, 512) |
| 130 | conv2d_62       | Conv2D       | (None, 32, 512, 512) |
| 131 | activation_41   | Activation   | (None, 32, 512, 512) |
| 132 | add_33          | Add          | (None, 32, 512, 512) |
| 133 | conv2d_63       | Conv2D       | (None, 32, 512, 512) |
| 134 | activation_42   | Activation   | (None, 32, 512, 512) |
| 135 | add_34          | Add          | (None, 32, 512, 512) |
| 136 | conv2d_64       | Conv2D       | (None, 1, 512, 512)  |
| 137 | activation_43   | Activation   | (None, 1, 512, 512)  |

**Table S2:** Transformation functions layer by layer of the R2-UNet architecture

### Attention-UNet

| Layer # | Name            | Type         | Shape                 |
|---------|-----------------|--------------|-----------------------|
| 0       | input_1         | InputLayer   | [(None, 1, 512, 512)] |
| 1       | conv2d          | Conv2D       | (None, 32, 512, 512)  |
| 2       | dropout         | Dropout      | (None, 32, 512, 512)  |
| 3       | conv2d_1        | Conv2D       | (None, 32, 512, 512)  |
| 4       | max_pooling2d   | MaxPooling2D | (None, 32, 256, 256)  |
| 5       | conv2d_2        | Conv2D       | (None, 64, 256, 256)  |
| 6       | dropout_1       | Dropout      | (None, 64, 256, 256)  |
| 7       | conv2d_3        | Conv2D       | (None, 64, 256, 256)  |
| 8       | max_pooling2d_1 | MaxPooling2D | (None, 64, 128, 128)  |
| 9       | conv2d_4        | Conv2D       | (None, 128, 128, 128) |
| 10      | dropout_2       | Dropout      | (None, 128, 128, 128) |
| 11      | conv2d_5        | Conv2D       | (None, 128, 128, 128) |
| 12      | max_pooling2d_2 | MaxPooling2D | (None, 128, 64, 64)   |
| 13      | conv2d_6        | Conv2D       | (None, 256, 64, 64)   |
| 14      | dropout_3       | Dropout      | (None, 256, 64, 64)   |
| 15      | conv2d_7        | Conv2D       | (None, 256, 64, 64)   |
| 16      | up_sampling2d   | UpSampling2D | (None, 256, 128, 128) |
| 17      | conv2d_8        | Conv2D       | (None, 64, 128, 128)  |
| 18      | conv2d_9        | Conv2D       | (None, 64, 128, 128)  |
| 19      | add             | Add          | (None, 64, 128, 128)  |
| 20      | activation      | Activation   | (None, 64, 128, 128)  |
| 21      | conv2d_10       | Conv2D       | (None, 1, 128, 128)   |
| 22      | activation_1    | Activation   | (None, 1, 128, 128)   |
| 23      | multiply        | Multiply     | (None, 128, 128, 128) |
| 24      | lambda          | Lambda       | (None, 384, 128, 128) |
| 25      | conv2d_11       | Conv2D       | (None, 128, 128, 128) |
| 26      | dropout_4       | Dropout      | (None, 128, 128, 128) |
| 27      | conv2d_12       | Conv2D       | (None, 128, 128, 128) |
| 28      | up_sampling2d_1 | UpSampling2D | (None, 128, 256, 256) |
| 29      | conv2d_13       | Conv2D       | (None, 32, 256, 256)  |
| 30      | conv2d_14       | Conv2D       | (None, 32, 256, 256)  |
| 31      | add_1           | Add          | (None, 32, 256, 256)  |
| 32      | activation_2    | Activation   | (None, 32, 256, 256)  |
| 33      | conv2d_15       | Conv2D       | (None, 1, 256, 256)   |
| 34      | activation_3    | Activation   | (None, 1, 256, 256)   |
| 35      | multiply_1      | Multiply     | (None, 64, 256, 256)  |
| 36      | lambda_1        | Lambda       | (None, 192, 256, 256) |
| 37      | conv2d_16       | Conv2D       | (None, 64, 256, 256)  |
| 38      | dropout_5       | Dropout      | (None, 64, 256, 256)  |
| 39      | conv2d_17       | Conv2D       | (None, 64, 256, 256)  |
| 40      | up_sampling2d_2 | UpSampling2D | (None, 64, 512, 512)  |
| 41      | conv2d_18       | Conv2D       | (None, 16, 512, 512)  |
| 42      | conv2d_19       | Conv2D       | (None, 16, 512, 512)  |
| 43      | add_2           | Add          | (None, 16, 512, 512)  |
| 44      | activation_4    | Activation   | (None, 16, 512, 512)  |
| 45      | conv2d_20       | Conv2D       | (None, 1, 512, 512)   |
| 46      | activation_5    | Activation   | (None, 1, 512, 512)   |
| 47      | multiply_2      | Multiply     | (None, 32, 512, 512)  |

|                 |            |                      |
|-----------------|------------|----------------------|
| 48 lambda_2     | Lambda     | (None, 96, 512, 512) |
| 49 conv2d_21    | Conv2D     | (None, 32, 512, 512) |
| 50 dropout_6    | Dropout    | (None, 32, 512, 512) |
| 51 conv2d_22    | Conv2D     | (None, 32, 512, 512) |
| 52 conv2d_23    | Conv2D     | (None, 1, 512, 512)  |
| 53 activation_6 | Activation | (None, 1, 512, 512)  |

**Table S3:** Transformation functions layer by layer of the Attention-UNet architecture

### R2-Attention UNet

| Layer # | Name            | Type         | Shape                 |
|---------|-----------------|--------------|-----------------------|
| 0       | input_3         | InputLayer   | [(None, 1, 512, 512)] |
| 1       | conv2d_65       | Conv2D       | (None, 32, 512, 512)  |
| 2       | conv2d_66       | Conv2D       | (None, 32, 512, 512)  |
| 3       | activation_44   | Activation   | (None, 32, 512, 512)  |
| 4       | add_35          | Add          | (None, 32, 512, 512)  |
| 5       | conv2d_67       | Conv2D       | (None, 32, 512, 512)  |
| 6       | activation_45   | Activation   | (None, 32, 512, 512)  |
| 7       | add_36          | Add          | (None, 32, 512, 512)  |
| 8       | conv2d_68       | Conv2D       | (None, 32, 512, 512)  |
| 9       | activation_46   | Activation   | (None, 32, 512, 512)  |
| 10      | conv2d_69       | Conv2D       | (None, 32, 512, 512)  |
| 11      | activation_47   | Activation   | (None, 32, 512, 512)  |
| 12      | add_37          | Add          | (None, 32, 512, 512)  |
| 13      | conv2d_70       | Conv2D       | (None, 32, 512, 512)  |
| 14      | activation_48   | Activation   | (None, 32, 512, 512)  |
| 15      | add_38          | Add          | (None, 32, 512, 512)  |
| 16      | conv2d_71       | Conv2D       | (None, 32, 512, 512)  |
| 17      | activation_49   | Activation   | (None, 32, 512, 512)  |
| 18      | add_39          | Add          | (None, 32, 512, 512)  |
| 19      | max_pooling2d_6 | MaxPooling2D | (None, 32, 256, 256)  |
| 20      | conv2d_72       | Conv2D       | (None, 64, 256, 256)  |
| 21      | conv2d_73       | Conv2D       | (None, 64, 256, 256)  |
| 22      | activation_50   | Activation   | (None, 64, 256, 256)  |
| 23      | add_40          | Add          | (None, 64, 256, 256)  |
| 24      | conv2d_74       | Conv2D       | (None, 64, 256, 256)  |
| 25      | activation_51   | Activation   | (None, 64, 256, 256)  |
| 26      | add_41          | Add          | (None, 64, 256, 256)  |
| 27      | conv2d_75       | Conv2D       | (None, 64, 256, 256)  |
| 28      | activation_52   | Activation   | (None, 64, 256, 256)  |
| 29      | conv2d_76       | Conv2D       | (None, 64, 256, 256)  |
| 30      | activation_53   | Activation   | (None, 64, 256, 256)  |
| 31      | add_42          | Add          | (None, 64, 256, 256)  |
| 32      | conv2d_77       | Conv2D       | (None, 64, 256, 256)  |
| 33      | activation_54   | Activation   | (None, 64, 256, 256)  |
| 34      | add_43          | Add          | (None, 64, 256, 256)  |
| 35      | conv2d_78       | Conv2D       | (None, 64, 256, 256)  |
| 36      | activation_55   | Activation   | (None, 64, 256, 256)  |
| 37      | add_44          | Add          | (None, 64, 256, 256)  |
| 38      | max_pooling2d_7 | MaxPooling2D | (None, 64, 128, 128)  |
| 39      | conv2d_79       | Conv2D       | (None, 128, 128, 128) |
| 40      | conv2d_80       | Conv2D       | (None, 128, 128, 128) |
| 41      | activation_56   | Activation   | (None, 128, 128, 128) |
| 42      | add_45          | Add          | (None, 128, 128, 128) |
| 43      | conv2d_81       | Conv2D       | (None, 128, 128, 128) |
| 44      | activation_57   | Activation   | (None, 128, 128, 128) |
| 45      | add_46          | Add          | (None, 128, 128, 128) |
| 46      | conv2d_82       | Conv2D       | (None, 128, 128, 128) |
| 47      | activation_58   | Activation   | (None, 128, 128, 128) |

|    |                 |              |                       |
|----|-----------------|--------------|-----------------------|
| 48 | conv2d_83       | Conv2D       | (None, 128, 128, 128) |
| 49 | activation_59   | Activation   | (None, 128, 128, 128) |
| 50 | add_47          | Add          | (None, 128, 128, 128) |
| 51 | conv2d_84       | Conv2D       | (None, 128, 128, 128) |
| 52 | activation_60   | Activation   | (None, 128, 128, 128) |
| 53 | add_48          | Add          | (None, 128, 128, 128) |
| 54 | conv2d_85       | Conv2D       | (None, 128, 128, 128) |
| 55 | activation_61   | Activation   | (None, 128, 128, 128) |
| 56 | add_49          | Add          | (None, 128, 128, 128) |
| 57 | max_pooling2d_8 | MaxPooling2D | (None, 128, 64, 64)   |
| 58 | conv2d_86       | Conv2D       | (None, 256, 64, 64)   |
| 59 | conv2d_87       | Conv2D       | (None, 256, 64, 64)   |
| 60 | activation_62   | Activation   | (None, 256, 64, 64)   |
| 61 | add_50          | Add          | (None, 256, 64, 64)   |
| 62 | conv2d_88       | Conv2D       | (None, 256, 64, 64)   |
| 63 | activation_63   | Activation   | (None, 256, 64, 64)   |
| 64 | add_51          | Add          | (None, 256, 64, 64)   |
| 65 | conv2d_89       | Conv2D       | (None, 256, 64, 64)   |
| 66 | activation_64   | Activation   | (None, 256, 64, 64)   |
| 67 | conv2d_90       | Conv2D       | (None, 256, 64, 64)   |
| 68 | activation_65   | Activation   | (None, 256, 64, 64)   |
| 69 | add_52          | Add          | (None, 256, 64, 64)   |
| 70 | conv2d_91       | Conv2D       | (None, 256, 64, 64)   |
| 71 | activation_66   | Activation   | (None, 256, 64, 64)   |
| 72 | add_53          | Add          | (None, 256, 64, 64)   |
| 73 | conv2d_92       | Conv2D       | (None, 256, 64, 64)   |
| 74 | activation_67   | Activation   | (None, 256, 64, 64)   |
| 75 | add_54          | Add          | (None, 256, 64, 64)   |
| 76 | up_sampling2d_6 | UpSampling2D | (None, 256, 128, 128) |
| 77 | conv2d_93       | Conv2D       | (None, 64, 128, 128)  |
| 78 | conv2d_94       | Conv2D       | (None, 64, 128, 128)  |
| 79 | add_55          | Add          | (None, 64, 128, 128)  |
| 80 | activation_68   | Activation   | (None, 64, 128, 128)  |
| 81 | conv2d_95       | Conv2D       | (None, 1, 128, 128)   |
| 82 | activation_69   | Activation   | (None, 1, 128, 128)   |
| 83 | multiply        | Multiply     | (None, 128, 128, 128) |
| 84 | lambda_3        | Lambda       | (None, 384, 128, 128) |
| 85 | conv2d_96       | Conv2D       | (None, 128, 128, 128) |
| 86 | conv2d_97       | Conv2D       | (None, 128, 128, 128) |
| 87 | activation_70   | Activation   | (None, 128, 128, 128) |
| 88 | add_56          | Add          | (None, 128, 128, 128) |
| 89 | conv2d_98       | Conv2D       | (None, 128, 128, 128) |
| 90 | activation_71   | Activation   | (None, 128, 128, 128) |
| 91 | add_57          | Add          | (None, 128, 128, 128) |
| 92 | conv2d_99       | Conv2D       | (None, 128, 128, 128) |
| 93 | activation_72   | Activation   | (None, 128, 128, 128) |
| 94 | conv2d_100      | Conv2D       | (None, 128, 128, 128) |
| 95 | activation_73   | Activation   | (None, 128, 128, 128) |
| 96 | add_58          | Add          | (None, 128, 128, 128) |
| 97 | conv2d_101      | Conv2D       | (None, 128, 128, 128) |



|     |                 |              |                       |
|-----|-----------------|--------------|-----------------------|
| 98  | activation_74   | Activation   | (None, 128, 128, 128) |
| 99  | add_59          | Add          | (None, 128, 128, 128) |
| 100 | conv2d_102      | Conv2D       | (None, 128, 128, 128) |
| 101 | activation_75   | Activation   | (None, 128, 128, 128) |
| 102 | add_60          | Add          | (None, 128, 128, 128) |
| 103 | up_sampling2d_7 | UpSampling2D | (None, 128, 256, 256) |
| 104 | conv2d_103      | Conv2D       | (None, 32, 256, 256)  |
| 105 | conv2d_104      | Conv2D       | (None, 32, 256, 256)  |
| 106 | add_61          | Add          | (None, 32, 256, 256)  |
| 107 | activation_76   | Activation   | (None, 32, 256, 256)  |
| 108 | conv2d_105      | Conv2D       | (None, 1, 256, 256)   |
| 109 | activation_77   | Activation   | (None, 1, 256, 256)   |
| 110 | multiply_1      | Multiply     | (None, 64, 256, 256)  |
| 111 | lambda_4        | Lambda       | (None, 192, 256, 256) |
| 112 | conv2d_106      | Conv2D       | (None, 64, 256, 256)  |
| 113 | conv2d_107      | Conv2D       | (None, 64, 256, 256)  |
| 114 | activation_78   | Activation   | (None, 64, 256, 256)  |
| 115 | add_62          | Add          | (None, 64, 256, 256)  |
| 116 | conv2d_108      | Conv2D       | (None, 64, 256, 256)  |
| 117 | activation_79   | Activation   | (None, 64, 256, 256)  |
| 118 | add_63          | Add          | (None, 64, 256, 256)  |
| 119 | conv2d_109      | Conv2D       | (None, 64, 256, 256)  |
| 120 | activation_80   | Activation   | (None, 64, 256, 256)  |
| 121 | conv2d_110      | Conv2D       | (None, 64, 256, 256)  |
| 122 | activation_81   | Activation   | (None, 64, 256, 256)  |
| 123 | add_64          | Add          | (None, 64, 256, 256)  |
| 124 | conv2d_111      | Conv2D       | (None, 64, 256, 256)  |
| 125 | activation_82   | Activation   | (None, 64, 256, 256)  |
| 126 | add_65          | Add          | (None, 64, 256, 256)  |
| 127 | conv2d_112      | Conv2D       | (None, 64, 256, 256)  |
| 128 | activation_83   | Activation   | (None, 64, 256, 256)  |
| 129 | add_66          | Add          | (None, 64, 256, 256)  |
| 130 | up_sampling2d_8 | UpSampling2D | (None, 64, 512, 512)  |
| 131 | conv2d_113      | Conv2D       | (None, 16, 512, 512)  |
| 132 | conv2d_114      | Conv2D       | (None, 16, 512, 512)  |
| 133 | add_67          | Add          | (None, 16, 512, 512)  |
| 134 | activation_84   | Activation   | (None, 16, 512, 512)  |
| 135 | conv2d_115      | Conv2D       | (None, 1, 512, 512)   |
| 136 | activation_85   | Activation   | (None, 1, 512, 512)   |
| 137 | multiply_2      | Multiply     | (None, 32, 512, 512)  |
| 138 | lambda_5        | Lambda       | (None, 96, 512, 512)  |
| 139 | conv2d_116      | Conv2D       | (None, 32, 512, 512)  |
| 140 | conv2d_117      | Conv2D       | (None, 32, 512, 512)  |
| 141 | activation_86   | Activation   | (None, 32, 512, 512)  |
| 142 | add_68          | Add          | (None, 32, 512, 512)  |
| 143 | conv2d_118      | Conv2D       | (None, 32, 512, 512)  |
| 144 | activation_87   | Activation   | (None, 32, 512, 512)  |
| 145 | add_69          | Add          | (None, 32, 512, 512)  |
| 146 | conv2d_119      | Conv2D       | (None, 32, 512, 512)  |
| 147 | activation_88   | Activation   | (None, 32, 512, 512)  |

|     |               |            |                      |
|-----|---------------|------------|----------------------|
| 148 | conv2d_120    | Conv2D     | (None, 32, 512, 512) |
| 149 | activation_89 | Activation | (None, 32, 512, 512) |
| 150 | add_70        | Add        | (None, 32, 512, 512) |
| 151 | conv2d_121    | Conv2D     | (None, 32, 512, 512) |
| 152 | activation_90 | Activation | (None, 32, 512, 512) |
| 153 | add_71        | Add        | (None, 32, 512, 512) |
| 154 | conv2d_122    | Conv2D     | (None, 32, 512, 512) |
| 155 | activation_91 | Activation | (None, 32, 512, 512) |
| 156 | add_72        | Add        | (None, 32, 512, 512) |
| 157 | conv2d_123    | Conv2D     | (None, 1, 512, 512)  |
| 158 | activation_92 | Activation | (None, 1, 512, 512)  |

**Table S4:** Transformation functions layer by layer of the R2-Attention UNet architecture
